# Supplementary material for: Lipolytic actions of secretin in mouse adipocytes
Source: PubMed Central journal article supplement (PMC3886658; doi:10.1194/jlr.m038042), 2014-02

**Figure 1**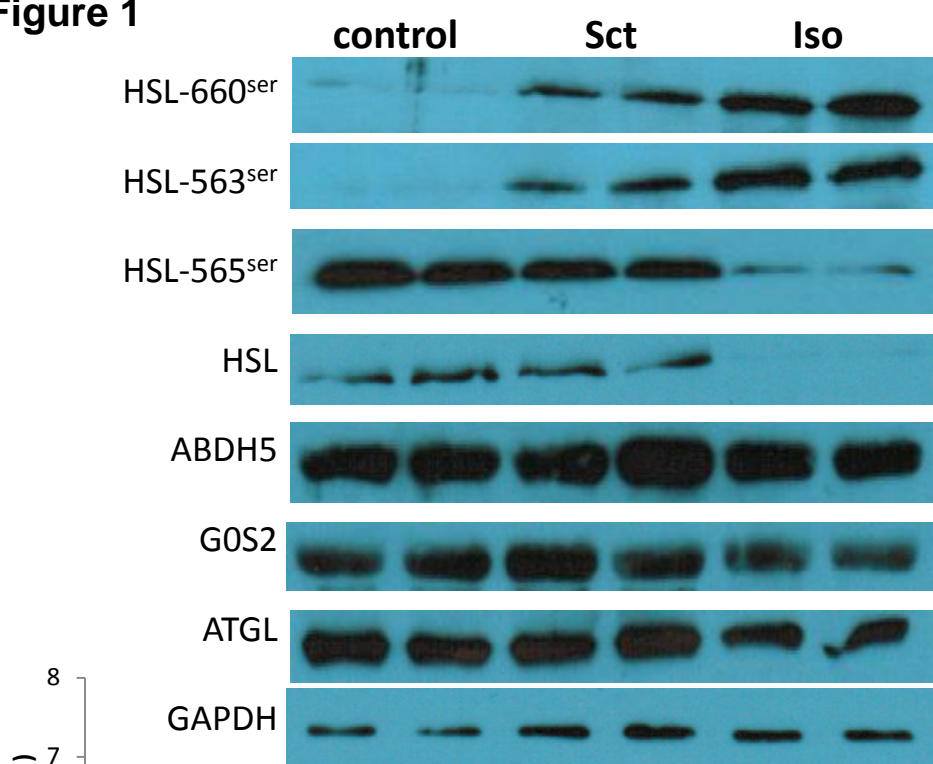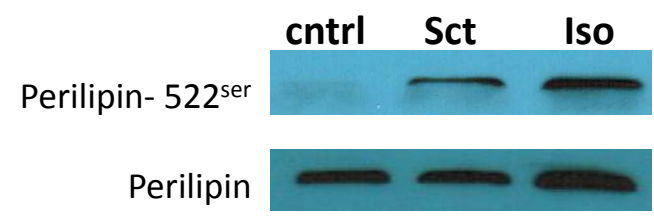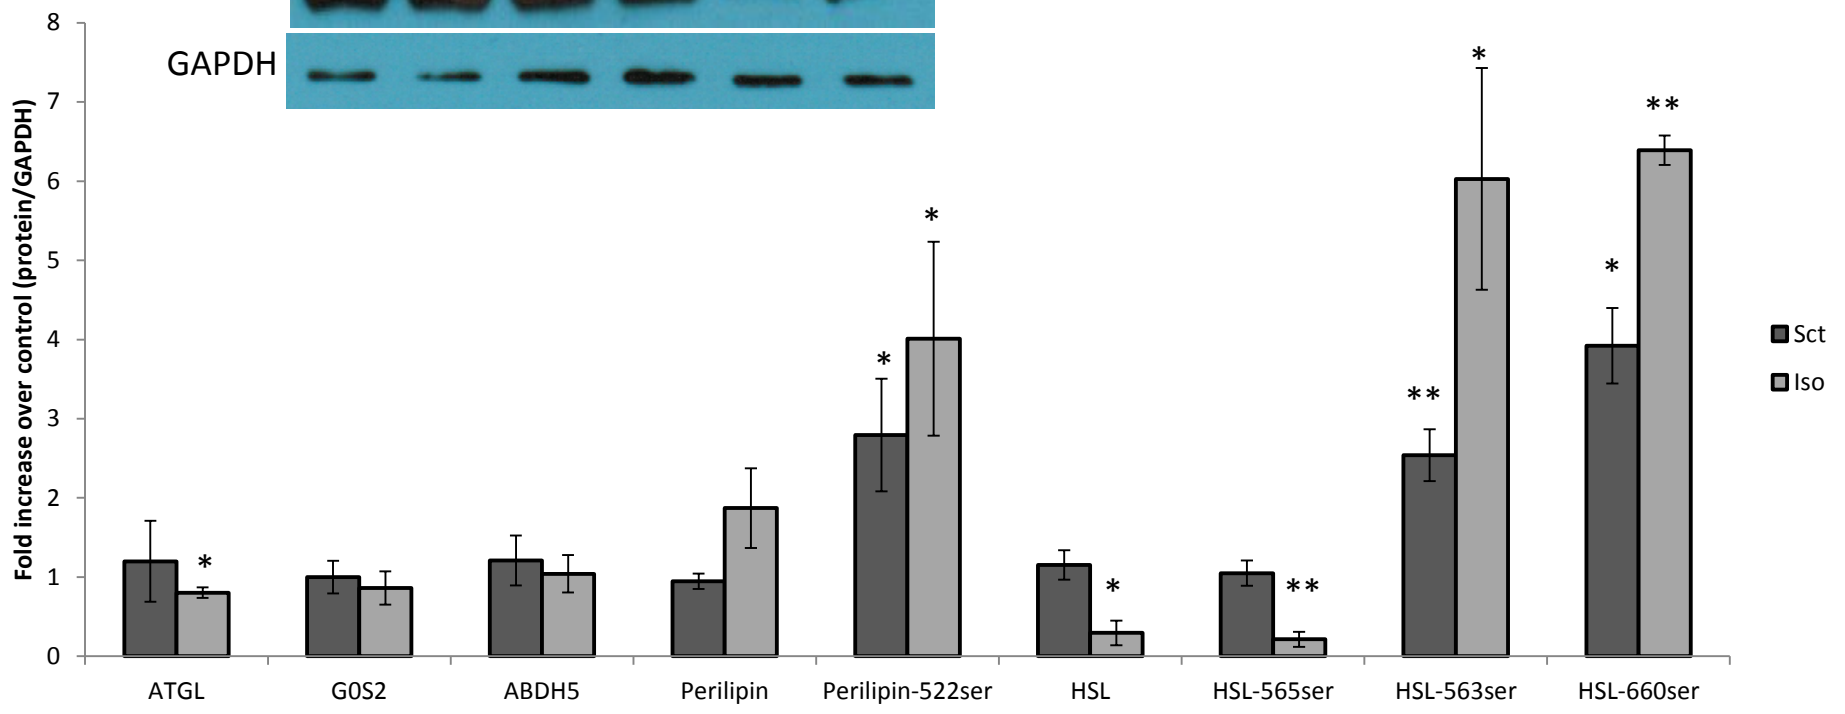

Supplement: supp_M038042_jlr.M038042-1.pdf [file supp_M038042_jlr.M038042-1.pdf]
